# Supplementary material for: Exploration of Estimated Emigration Trends of Polish Health Professionals
Source: MDPI journal article supplement (doi:10.3390/ijerph19020940), 2022-01-14
Supplement: s1 [file s1]

## Supplementary Material

**Table S1. Number of all certificates (confirming professional qualification and certificates of good standing) issued for doctors and dentists 2004-2020**

| Year         | Number of all certificates issued for doctors | Including graduates of the Medical State Exam | Number of all certificates issued for dentist | Including graduates of the Medical-Dental State Exam | Total number of certificates issued in selected years |
|--------------|-----------------------------------------------|-----------------------------------------------|-----------------------------------------------|------------------------------------------------------|-------------------------------------------------------|
| 2004-2009    | 16 032                                        | 897                                           | 4 263                                         | 34                                                   | 21 192                                                |
| 2010         | 1 251                                         | 194                                           | 357                                           | 40                                                   | 1 802                                                 |
| 2011         | 1 094                                         | 209                                           | 351                                           | 46                                                   | 1 654                                                 |
| 2012         | 1 237                                         | 283                                           | 342                                           | 54                                                   | 1 862                                                 |
| 2013         | 1 110                                         | 173                                           | 338                                           | 44                                                   | 1 621                                                 |
| 2014         | 1 151                                         | 25                                            | 378                                           | 5                                                    | 1 554                                                 |
| 2015         | 1 087                                         | 17                                            | 284                                           | 4                                                    | 1 388                                                 |
| 2016         | 901                                           | 28                                            | 247                                           | 3                                                    | 1 176                                                 |
| 2017         | 939                                           | 27                                            | 186                                           | 3                                                    | 1 152                                                 |
| 2018         | 805                                           | 16                                            | 174                                           | 3                                                    | 995                                                   |
| 2019         | 741                                           | 11                                            | 145                                           | 5                                                    | 897                                                   |
| 2020         | 588                                           | 10                                            | 129                                           | 3                                                    | 727                                                   |
| <b>Total</b> | <b>26 936</b>                                 | <b>1 890</b>                                  | <b>7 242</b>                                  | <b>244</b>                                           | <b>36 263</b>                                         |

*Source: data from the National Chamber of Physicians*

The data in Table S1 presents information on the certificates issued for doctors and dentists during the years 2004-2020. Persons who had been issued at least one type of certificate are included, both certificates confirming their qualifications and certificates of good standing (valid for only 3 months).
